# Supplementary material for: α3β1 integrin–controlled Smad7 regulates reepithelialization during wound healing in mice
Source: JCI journal article supplement (doi:10.1172/jci33538), 2008-01-27
Supplement: sd1 [file 1]

Supplementary Fig. 1

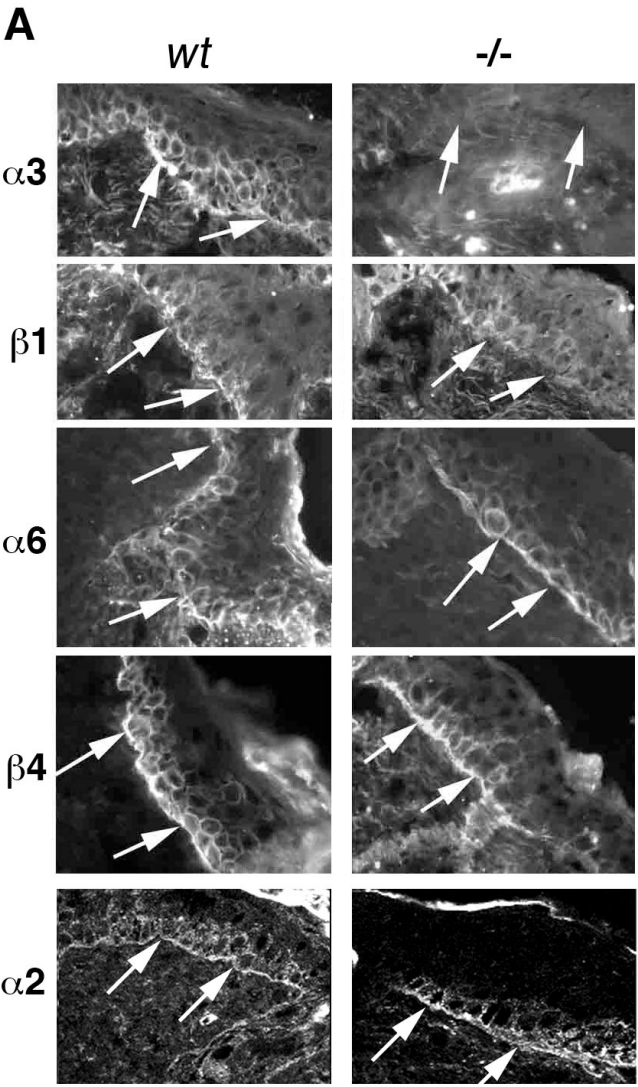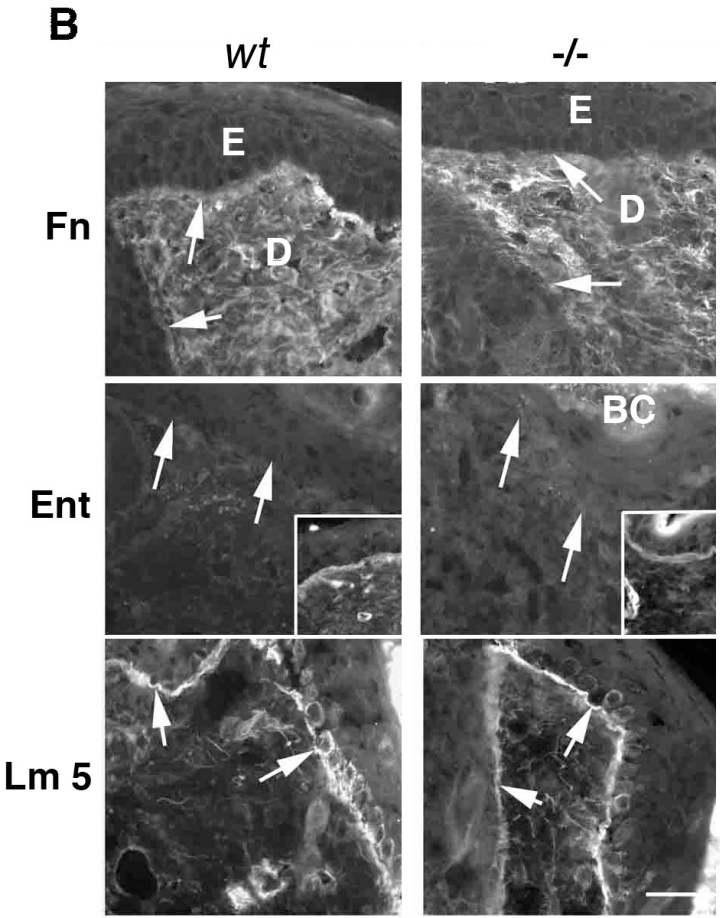

Supplementary Fig. 2

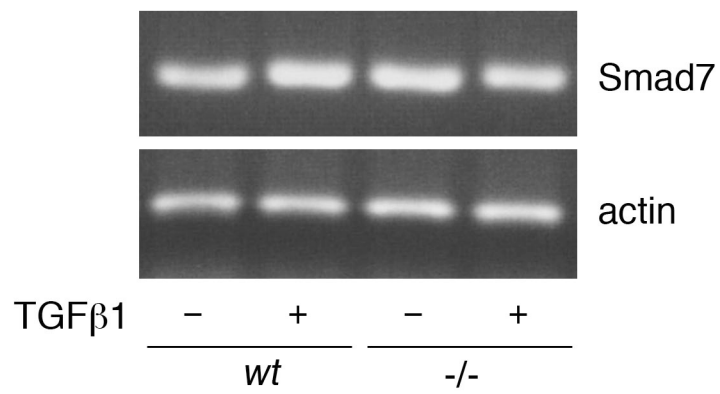

Supplementary Fig. 3

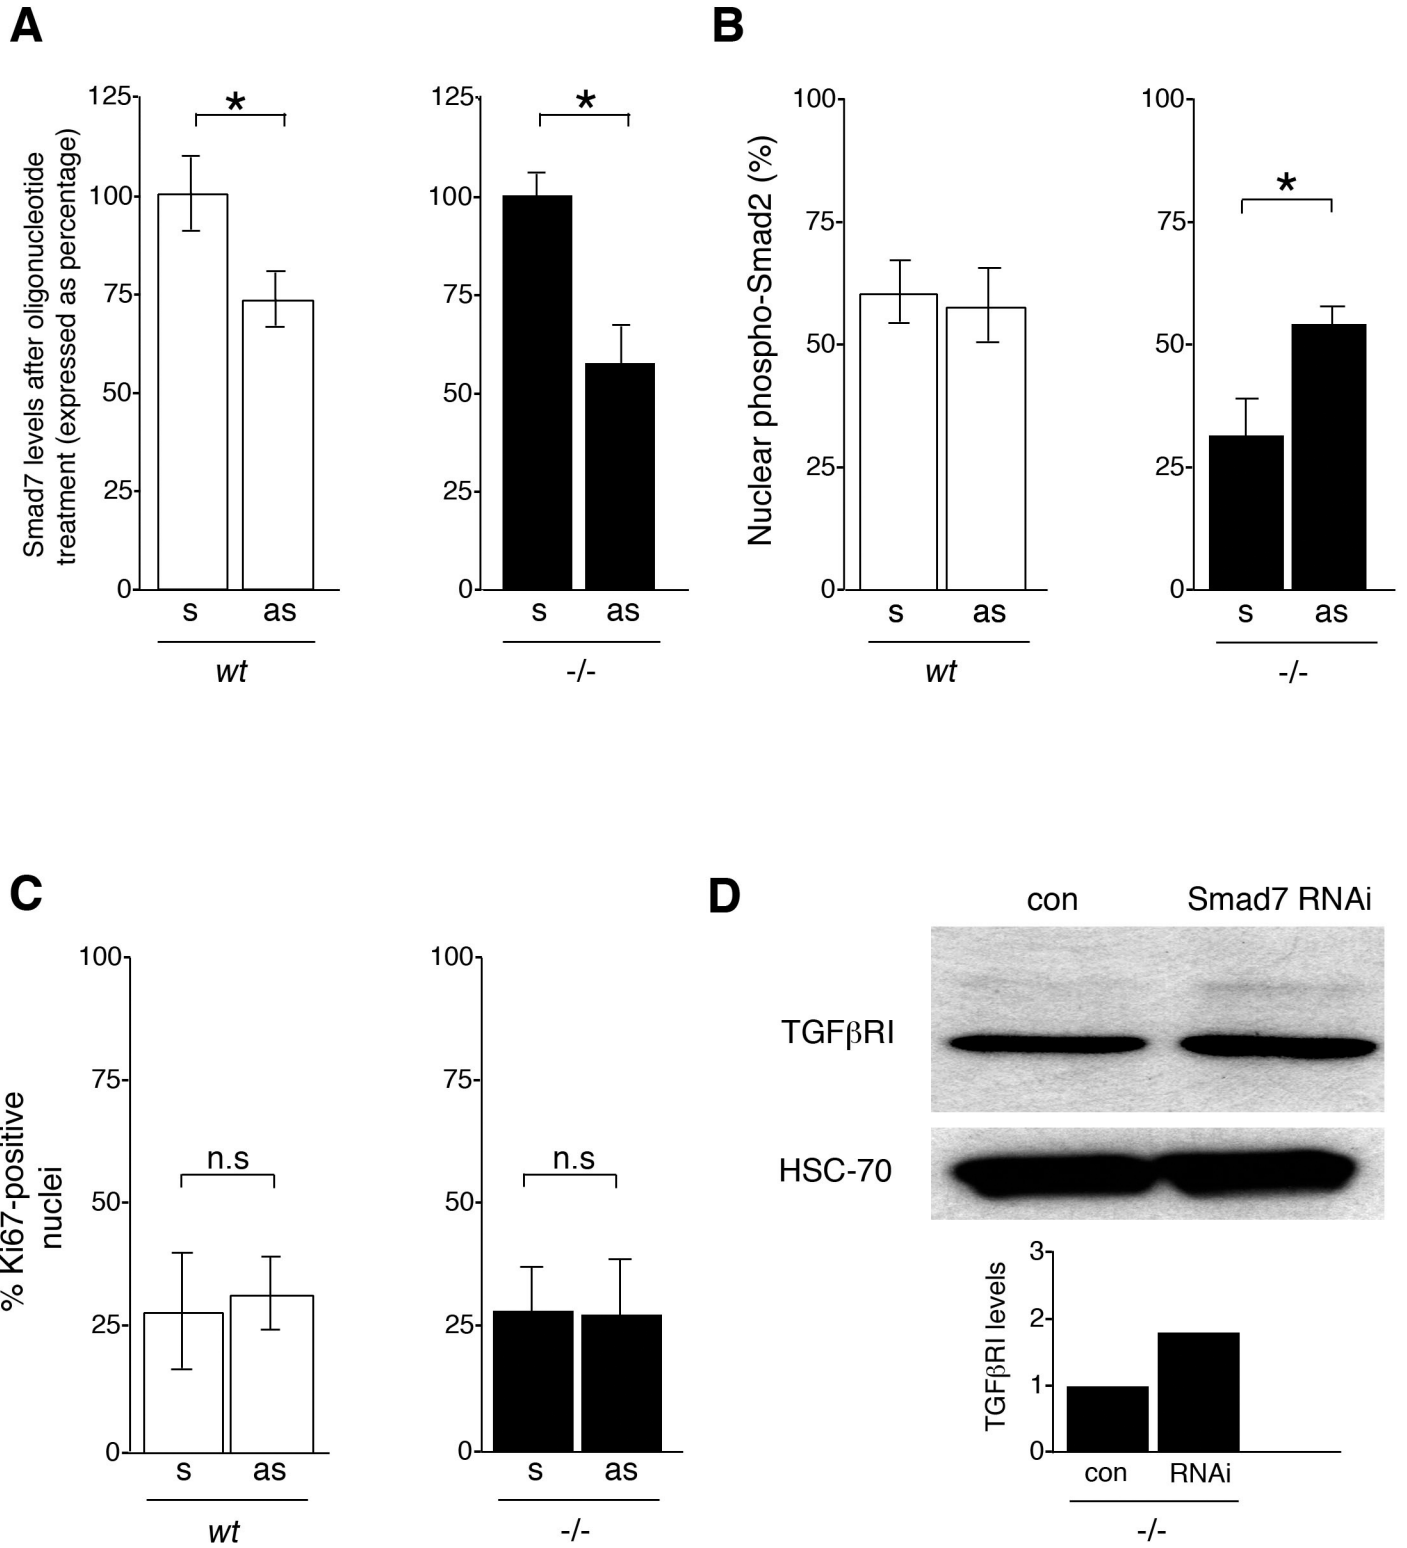

## SUPPLEMENTARY INFORMATION

### **Supplementary Figure 1. $\alpha$ 3-integrin deficiency does not affect the expression and distribution of other integrins or ECM molecules during wound healing.**

*Wt* and *-/-* wounded skin sections taken 2 days post-injury were immunostained for  $\alpha$ 3-integrin,  $\beta$ 1-integrin,  $\alpha$ 6-integrin,  $\beta$ 4-integrin and  $\alpha$ 2-integrin (**A**), Fn, Ent, and Lm 5 (**B**). (**A**) In *wt* skin,  $\alpha$ 3- and  $\beta$ 1-integrins were expressed in basal and suprabasal keratinocytes in the migrating epidermis over the wound bed (**A**). As expected,  $\alpha$ 3-integrin was not detectable in *-/-* epidermis, and  $\beta$ 1-integrin distribution appeared reduced.  $\alpha$ 6-,  $\beta$ 4- and  $\alpha$ 2-integrins were expressed in basal and suprabasal keratinocytes migrating over the wound bed, with no detectable difference in distribution between *wt* and *-/-* skin. (**B**) Fn was observed in the neodermis, beneath the migrating epidermis, with no apparent difference between *wt* and *-/-* skin. Ent was not detectable in the basement membrane immediately below the migrating epithelial lip of either *wt* or *-/-* wounds. However, Ent was visible in the basement membrane proximal to the newly formed epidermis (insert). In both *wt* and *-/-* wounded skin, Lm 5 was detected in the basement membrane zone and within the basal keratinocytes of migrating epithelia. Arrows indicate basement membrane zone. BC = blood clot, E = epidermis, D = dermis. Scale bar = 50  $\mu$ m.

### **Supplementary Figure 2. Smad7 RNA levels are not changed in wild-type and $\alpha$ 3-null keratinocytes.**

RT-PCR analysis of Smad7 RNA levels in *wt* and *-/-* keratinocytes treated with TGF $\beta$ 1 (+) or left untreated (-). Actin provides a loading control. n = 3 separate RNA isolations.

**Supplementary Figure 3. Smad7 inhibition decreases Smad7 levels and increases phospho-Smad2 levels in vivo.**

Quantitation of the level of inhibition of Smad7 *wt* and *-/-* wounds treated with Smad7 sense (s) and antisense (as) oligonucleotides (**A**). Quantitation of the number of phospho-Smad2 positive nuclei in *wt* and *-/-* wounds treated with Smad7 sense (s) and antisense (as) oligonucleotides (**B**). Quantitation of the number of Ki67 positive nuclei in sense (s) and antisense (as) Smad7 oligonucleotide treated wounds (**C**). TGF $\beta$ RI levels in *-/-* keratinocytes after Smad7 RNAi treatment (**D**). Results in **A** represent the percentage decrease in Smad7 levels relative to sense treated wounds ( $\pm$  SEM). n = 4-5/genotype/treatment. \* $P < 0.007-0.08$ . n.s = no significant difference. HSC-70 was used as a loading control.
